# Supplementary material for: Validating the Modified Drug Adherence Work-Up (M-DRAW) Tool to Identify and Address Barriers to Medication Adherence
Source: MDPI journal article supplement (doi:10.3390/pharmacy5030052), 2017-09-08
Supplement: s1 [file s1]

**Please tell us about yourself**

|                                                                                      |                                                                                                                                                                                                                                                                      |                                                                                                                                                                                                                   |
|--------------------------------------------------------------------------------------|----------------------------------------------------------------------------------------------------------------------------------------------------------------------------------------------------------------------------------------------------------------------|-------------------------------------------------------------------------------------------------------------------------------------------------------------------------------------------------------------------|
| <b>1. Gender</b>                                                                     | <input type="checkbox"/> Male                                                                                                                                                                                                                                        | <input type="checkbox"/> Female                                                                                                                                                                                   |
| <b>2. Age</b>                                                                        | _____ years old                                                                                                                                                                                                                                                      |                                                                                                                                                                                                                   |
| <b>3. Zip code</b>                                                                   |                                                                                                                                                                                                                                                                      |                                                                                                                                                                                                                   |
| <b>4. Ethnicity</b>                                                                  | <input type="checkbox"/> White<br><input type="checkbox"/> Hispanic / Latino<br><input type="checkbox"/> Other: _____                                                                                                                                                | <input type="checkbox"/> Black<br><input type="checkbox"/> Asian / Pacific Islander                                                                                                                               |
| <b>5. Marital status</b>                                                             | <input type="checkbox"/> Single – never married<br><input type="checkbox"/> Separated / divorced                                                                                                                                                                     | <input type="checkbox"/> Married / live with a partner<br><input type="checkbox"/> Widowed                                                                                                                        |
| <b>6. Approximate annual income</b>                                                  | <input type="checkbox"/> Less than \$25,000<br><input type="checkbox"/> \$51,000 – \$75,000<br><input type="checkbox"/> More than \$100,000                                                                                                                          | <input type="checkbox"/> \$25,000 – \$50,000<br><input type="checkbox"/> \$76,000 – \$100,000<br><input type="checkbox"/> Prefer not to disclose                                                                  |
| <b>7. Highest education</b>                                                          | <input type="checkbox"/> Less than high school<br><input type="checkbox"/> Some college<br><input type="checkbox"/> Master's degree or above                                                                                                                         | <input type="checkbox"/> High school diploma<br><input type="checkbox"/> Bachelor's degree<br><input type="checkbox"/> Prefer not to disclose                                                                     |
| <b>8. Type of insurance (check all that apply)</b>                                   | <input type="checkbox"/> Medicare<br><input type="checkbox"/> Private                                                                                                                                                                                                | <input type="checkbox"/> Medicaid<br><input type="checkbox"/> Other: _____                                                                                                                                        |
| <b>9. Do you have any of the following conditions which you take medication for?</b> | <input type="checkbox"/> High blood pressure<br><input type="checkbox"/> Diabetes<br><input type="checkbox"/> Heart disease (e.g. A-fib)<br><input type="checkbox"/> COPD / Asthma<br><input type="checkbox"/> Chronic pain<br><input type="checkbox"/> Other: _____ | <input type="checkbox"/> High cholesterol<br><input type="checkbox"/> Cancer<br><input type="checkbox"/> Depression<br><input type="checkbox"/> Arthritis<br><input type="checkbox"/> Complications from a stroke |
| <b>10. How would you rate your overall health?</b>                                   | <input type="checkbox"/> Excellent<br><input type="checkbox"/> Fair                                                                                                                                                                                                  | <input type="checkbox"/> Good<br><input type="checkbox"/> Poor                                                                                                                                                    |
| <b>11. Do you have prescription drug insurance?</b>                                  | <input type="checkbox"/> Yes                                                                                                                                                                                                                                         | <input type="checkbox"/> No                                                                                                                                                                                       |

Participant ID: \_\_\_\_\_

**Screening Questions (All patients before enrollment)**

1. Are you at least 18 years old?
2. Do you speak and understand English or Spanish?
3. Do you live at an institutional setting such as nursing home?
4. Do you have at least 1 chronic condition which you regularly take medication for?

**Data Collection Sheet (Baseline)**

|                                                                                                                       |                                                                                                                     |                                                                                   |                              |
|-----------------------------------------------------------------------------------------------------------------------|---------------------------------------------------------------------------------------------------------------------|-----------------------------------------------------------------------------------|------------------------------|
| 1. Assigned group based on Priming Question                                                                           | <input type="checkbox"/> UNA                                                                                        | <input type="checkbox"/> PNA                                                      | <input type="checkbox"/> ONA |
| 2. Assigned study group                                                                                               | <input type="checkbox"/> Control                                                                                    | <input type="checkbox"/> Intervention                                             |                              |
| 3. Present chronic condition(s)                                                                                       | <input type="checkbox"/> Hypertension<br><input type="checkbox"/> Dyslipidemia<br><input type="checkbox"/> Diabetes | <input type="checkbox"/> Stroke / A-fib<br><input type="checkbox"/> Other: _____  |                              |
| 4. Chronic medication(s)                                                                                              | 1.<br>2.<br>3.<br>4.                                                                                                | 5.<br>6.<br>7.<br>8.                                                              |                              |
| 5. Baseline clinical measure                                                                                          | <input type="checkbox"/> A1C: _____<br><input type="checkbox"/> INR: _____                                          | <input type="checkbox"/> BP : _____<br><input type="checkbox"/> Cholestech: _____ |                              |
| 6. Baseline 6-month PDC                                                                                               |                                                                                                                     |                                                                                   |                              |
| 7. (For the pharmacist) At any time during this interview, did you sense an issue about decreased cognitive function? | <input type="checkbox"/> Yes <input type="checkbox"/> No                                                            |                                                                                   |                              |

**Data Collection Sheet (Follow-up)**

|                                                    |                                                                                                                                                                                                   |
|----------------------------------------------------|---------------------------------------------------------------------------------------------------------------------------------------------------------------------------------------------------|
| 1. Assigned group based on Priming Question        | <input type="checkbox"/> UNA <input type="checkbox"/> PNA <input type="checkbox"/> ONA                                                                                                            |
| 2. Assigned study group                            | <input type="checkbox"/> Control <input type="checkbox"/> Intervention                                                                                                                            |
| 3. Present chronic condition(s)                    | <input type="checkbox"/> Hypertension <input type="checkbox"/> Stroke / A-fib<br><input type="checkbox"/> Dyslipidemia <input type="checkbox"/> Other: _____<br><input type="checkbox"/> Diabetes |
| 4. Chronic medication(s)                           | 1. _____ 5. _____<br>2. _____ 6. _____<br>3. _____ 7. _____<br>4. _____ 8. _____                                                                                                                  |
| 5. Follow-up clinical measure                      | <input type="checkbox"/> A1C: _____ <input type="checkbox"/> BP : _____<br><input type="checkbox"/> INR: _____ <input type="checkbox"/> Cholestech: _____                                         |
| 6. Follow-up 3-month PDC                           |                                                                                                                                                                                                   |
| 7. Remaining 3-month PDC                           |                                                                                                                                                                                                   |
| 8. Follow-up survey item #1<br>(intervention only) | <input type="checkbox"/> Not at all helpful <input type="checkbox"/> Somewhat helpful<br><input type="checkbox"/> Very helpful                                                                    |
| 9. Follow-up survey item #2<br>(intervention only) | <input type="checkbox"/> No change <input type="checkbox"/> Little change<br><input type="checkbox"/> Significant change                                                                          |

**Follow-up Survey (only for intervention group)**

1. Was the interview you received 3 months ago helpful?

Not at all helpful / Somewhat helpful / Very helpful

2. Do you feel like there has been a change in the way you take your medication because of the interview you received?

No change / Little change / Significant change
